# Supplementary material for: Effect of Thermal Treatment on the Self-Assembly of Wheat Gluten Polypeptide
Source: MDPI journal article supplement (doi:10.3390/molecules28020834), 2023-01-14
Supplement: s1 [file s1]

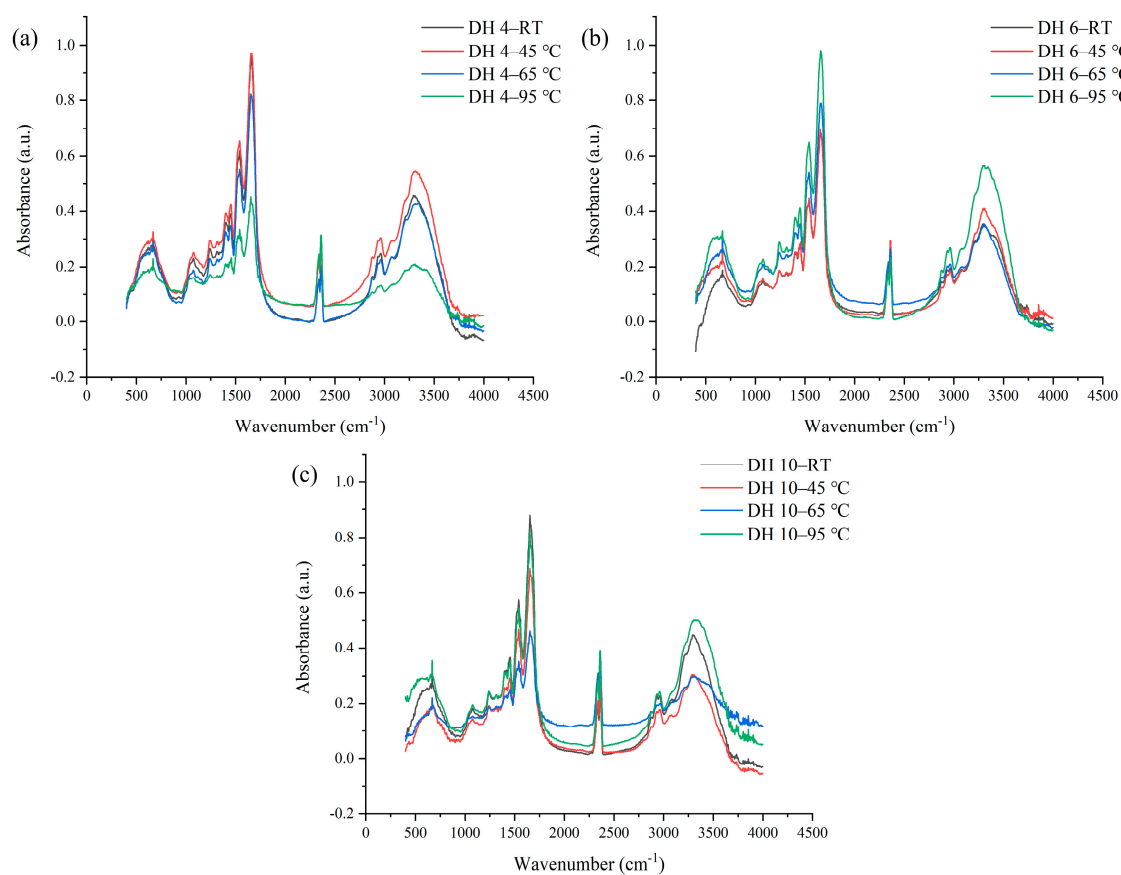

**Figure S1.** FT-IR spectra of DH 4 (a), DH 6 (b), and DH 10 (c) under different heating temperatures. DH 4, DH 6, and DH 10 represent the degree of hydrolysis 4.0%, degree of hydrolysis 6.0%, and degree of hydrolysis 10.0%, respectively

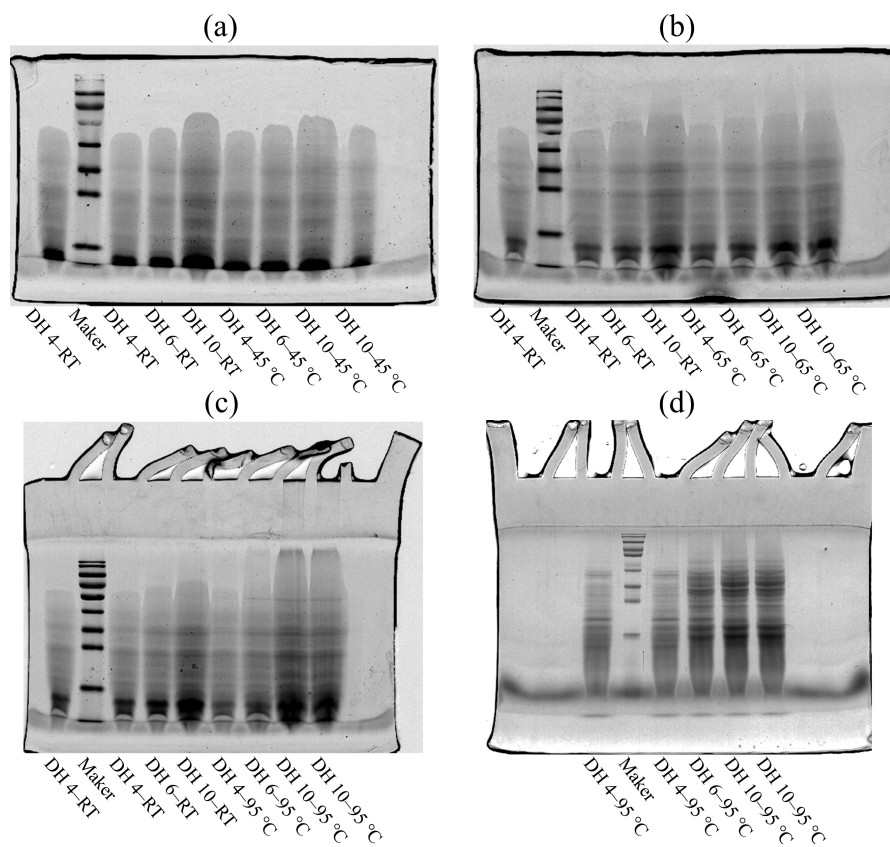

**Figure S2.** Original electropherograms of GPs heated at 45 (a), 65 °C (b), 95 °C (c), and of reduced GPs (d). DH 4, DH 6, and DH 10 represent the degree of hydrolysis 4.0%, degree of hydrolysis 6.0%, and degree of hydrolysis 10.0%, respectively.
